# Supplementary material for: Adsorptions of Cd(ii) and methylene blue from aqueous solution by silica hybrid hollow spheres
Source: Royal Society of Chemistry journal article supplement (doi:10.1039/c5ra13413g), 2015-01-01
Supplement: c5ra13413g1.pdf [file c5ra13413g1.pdf]

Supporting information

Adsorptions of Cd(II) and Methylene Blue from Aqueous Solution by Silica

Hybrid Hollow Spheres

5

Jing Hu,<sup>a,b</sup> Liqin Liu<sup>a</sup> and Zuobing Xiao<sup>a,b\*</sup>

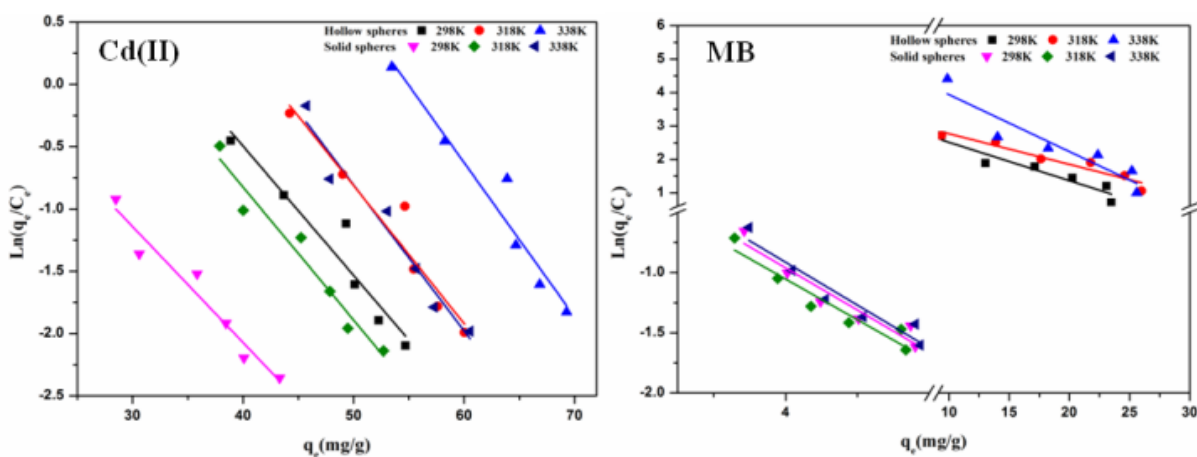

10

Fig. S1 Plots of  $\ln(q_e/C_e)$  as a function of  $q_e$  for Hollow spheres and Solid spheres at various temperature
